# Supplementary material for: Integrated Core Proteomics, Subtractive Proteomics, and Immunoinformatics Investigation to Unveil a Potential Multi-Epitope Vaccine against Schistosomiasis
Source: MDPI journal article supplement (doi:10.3390/vaccines9060658), 2021-06-16
Supplement: s1 [file s1]

**Table S1** CTL Epitopes predicted by IEDB Consensus Method

| Protein         |          |                                                                         |              |                |
|-----------------|----------|-------------------------------------------------------------------------|--------------|----------------|
| Calcium Binding |          |                                                                         |              |                |
| Epitopes        | Position | Alleles                                                                 | Antigenicity | Immunogenicity |
| EVEAVIEAY       | 285-293  | HLA-A*26:01<br>HLA-A*25:01<br>HLA-A*01:01<br>HLA-B*35:01                | 0.7113       | 0.34471        |
| FSPRRYRKL       | 152-160  | HLA-B*14:02<br>HLA-C*07:02<br>HLA-E*01:01<br>HLA-B*08:01<br>HLA-C*06:02 | 1.0381       | 0.01308        |
| YLDEDYLHS       | 387-395  | HLA-C*05:01                                                             | 0.8030       | 0.13561        |
| DSDHDGIPN       | 267-275  | HLA-C*08:02<br>HLA-C*05:01                                              | 0.5176       | 0.19909        |
| LEDEDHDMI       | 318-326  | HLA-B*40:01<br>HLA-C*05:01                                              | 0.9741       | 0.19852        |
| IPDHLEGDI       | 32-40    | HLA-C*08:02<br>HLA-B*51:01<br>HLA-B*53:01                               | 1.3173       | 0.16476        |
| KQDNRLRL        | 332-340  | HLA-B*48:01<br>HLA-A*02:06                                              | 0.8049       | 0.06153        |
| VEVEAVIEA       | 284-292  | HLA-B*40:02<br>HLA-B*18:01                                              | 0.7580       | 0.36193        |
| DSDGDGVLD       | 498-506  | HLA-C*05:01<br>HLA-C*08:02                                              | 1.7229       | 0.17921        |
| DKDTNNNGM       | 294-302  | HLA-C*05:01                                                             | 1.2454       | 0.04821        |
| ESDDDDDDD       | 685-693  | HLA-C*05:01                                                             | 2.2082       | 0.10368        |
| DSDGDGILD       | 181-189  | HLA-C*08:02<br>HLA-C*05:01                                              | 1.4040       | 0.20064        |
| DTDDDETNN       | 700-708  | HLA-C*05:01                                                             | 1.3095       | 0.17435        |
| EGDINHNGI       | 37-45    | HLA-C*05:01                                                             | 2.0346       | 0.17961        |
| EDDLDGNGI       | 364-372  | HLA-C*05:01<br>HLA-C*08:02                                              | 2.2002       | 0.06388        |
| QFSPRRYRK       | 151-159  | HLA-A*31:01                                                             | 1.2006       | 0.06138        |

|                                 |         |                                                                                                       |        |         |
|---------------------------------|---------|-------------------------------------------------------------------------------------------------------|--------|---------|
|                                 |         | HLA-C*04:01                                                                                           |        |         |
| YDDDDDDNDG                      | 474-482 | HLA-C*05:01                                                                                           | 1.7125 | 0.0795  |
| FYDDDDDDND                      | 473-481 | HLA-C*08:02                                                                                           | 1.1230 | 0.08694 |
| KQDRRHKKI                       | 604-612 | HLA-A*32:01                                                                                           | 1.5880 | 0.04143 |
| AKDTDGDGI                       | 514-522 | HLA-C*08:02<br>HLA-C*05:01                                                                            | 1.3628 | 0.13828 |
| DDDIDHAHY                       | 736-744 | HLA-C*05:01                                                                                           | 0.7508 | 0.24509 |
| DRRHKKIAN                       | 606-614 | HLA-B*14:02                                                                                           | 1.0397 | 0.01303 |
| DIHEDENKN                       | 550-558 | HLA-A*25:01                                                                                           | 1.4391 | 0.09564 |
| Mycosubtilin synthase subunit C |         |                                                                                                       |        |         |
| RQLGFNVNL                       | 514-522 | HLA-B*48:01<br>HLA-A*32:01<br>HLA-B*40:01<br>HLA-A*02:06<br>HLA-B*27:05<br>HLA-B*39:01<br>HLA-B*40:02 | 1.5715 | 0.16947 |
| FIDPHTNHL                       | 262-270 | HLA-C*08:02<br>HLA-A*02:06<br>HLA-B*39:01<br>HLA-C*06:02<br>HLA-C*05:01<br>HLA-C*07:02<br>HLA-C*07:02 | 0.5218 | 0.07752 |
| RSRERARKV                       | 463-471 | HLA-C*15:02<br>HLA-C*06:02<br>HLA-A*30:01<br>HLA-C*07:01                                              | 1.9596 | 0.12246 |
| IVLTARYYY                       | 661-669 | HLA-A*29:02<br>HLA-A*30:02<br>HLA-A*11:01<br>HLA-B*57:01                                              | 1.1714 | 0.117   |
| YENPYEHTF                       | 669-677 | HLA-B*18:01<br>HLA-B*44:02<br>HLA-B*40:01<br>HLA-C*07:02<br>HLA-B*40:02<br>HLA-B*40:02<br>HLA-B*38:01 | 1.1243 | 0.12737 |

|           |         |                                                                                                                      |        |         |
|-----------|---------|----------------------------------------------------------------------------------------------------------------------|--------|---------|
|           |         | HLA-A*23:01                                                                                                          |        |         |
| RYYYENPYE | 666-674 | HLA-C*14:02<br>HLA-A*30:01                                                                                           | 0.5529 | 0.07497 |
| FMAVFSHYI | 373-381 | HLA-A*02:01<br>HLA-A*02:06<br>HLA-A*68:02<br>HLA-A*29:02<br>HLA-B*39:01<br>HLA-A*32:01<br>HLA-A*24:02<br>HLA-B*46:01 | 1.1695 | 0.03765 |
| DPHTNHLYI | 264-272 | HLA-B*51:01<br>HLA-B*53:01                                                                                           | 0.7871 | 0.06219 |
| VNGIRFHAS | 282-290 | HLA-B*08:01<br>HLA-B*08:01                                                                                           | 0.5288 | 0.35568 |
| YYENPYEHT | 668-676 | HLA-C*14:02<br>HLA-C*07:02                                                                                           | 1.0707 | 0.11511 |
| KLVGVLISL | 681-689 | HLA-A*02:06<br>HLA-A*02:01<br>HLA-B*48:01<br>HLA-A*32:01                                                             | 1.1142 | 0.09292 |
| VLVNAFIEK | 622-630 | HLA-A*11:01<br>HLA-A*03:01                                                                                           | 0.9063 | 0.32601 |
| SRERARKVL | 464-472 | HLA-B*14:02<br>HLA-C*07:02<br>HLA-B*39:01<br>HLA-C*06:02                                                             | 1.2369 | 0.01352 |
| HMNENRNTM | 346-354 | HLA-C*07:02<br>HLA-B*39:01<br>HLA-B*35:01                                                                            | 0.9323 | 0.15829 |
| LLSTQIVAI | 727-735 | HLA-A*32:01<br>HLA-A*02:01                                                                                           | 0.5295 | 0.05554 |
| TVLATEQLR | 506-514 | HLA-A*68:01                                                                                                          | 0.9125 | 0.06358 |
| NVNLDVFTK | 519-527 | HLA-A*68:01<br>HLA-A*11:01                                                                                           | 1.4741 | 0.16868 |
| KYFQITHIT | 19-27   | HLA-C*14:02<br>HLA-A*23:01                                                                                           | 0.6024 | 0.19264 |
| YICGRTNEL | 271-279 | HLA-A*25:01<br>HLA-C*06:02<br>HLA-B*08:01<br>HLA-B*39:01                                                             | 0.5753 | 0.15658 |
| IIDVLVNAF | 619-627 | HLA-A*32:01<br>HLA-B*46:01<br>HLA-A*01:01                                                                            | 0.9993 | 0.0942  |
| PKDDEDFYL | 490-498 | HLA-B*38:01                                                                                                          | 0.5501 | 0.24454 |

|            |         |                                           |        |         |
|------------|---------|-------------------------------------------|--------|---------|
|            |         | HLA-E*01:03                               |        |         |
| QQLINLTKY  | 12-20   | HLA-A*30:02                               | 0.5046 | 0.02034 |
| EPNDNHEKI  | 357-365 | HLA-B*51:01<br>HLA-B*53:01                | 0.9947 | 0.00287 |
| KNDDFMAVF  | 369-377 | HLA-C*05:01<br>HLA-B*58:02<br>HLA-C*04:01 | 0.6749 | 0.03536 |
| GFNVNLDVF  | 517-525 | HLA-A*23:01<br>HLA-C*04:01<br>HLA-B*46:01 | 1.7873 | 0.06554 |
| IQGTAICIV  | 137-145 | HLA-A*02:06                               | 0.5705 | 0.2457  |
| MEDEWYLSS  | 583-591 | HLA-B*18:01                               | 1.1215 | 0.21415 |
| QTVHGRDLK  | 330-338 | HLA-A*68:01<br>HLA-A*11:01                | 1.3044 | 0.13991 |
| VLSVGTPIQ  | 130-138 | HLA-E*01:01                               | 1.2292 | 0.12578 |
| AKQGYAAVV  | 774-782 | HLA-B*39:01                               | 0.5217 | 0.08687 |
| KVNGIRFHA  | 281-289 | HLA-A*30:01                               | 1.3148 | 0.32802 |
| DLKLVCIFYV | 336-344 | HLA-E*01:03                               | 0.7469 | 0.00493 |
| QYLSPTFIN  | 383-391 | HLA-E*01:03<br>HLA-A*23:01                | 0.9109 | 0.03223 |
| TGKIGSILK  | 528-536 | HLA-A*30:01                               | 1.0987 | 0.04703 |
| LTEVIESYL  | 644-652 | HLA-A*01:01                               | 0.7447 | 0.15611 |
| NPYEHTFVK  | 671-679 | HLA-B*53:01<br>HLA-A*68:01                | 1.4480 | 0.29051 |
| TNHLYICGR  | 267-275 | HLA-A*68:01                               | 1.6066 | 0.09532 |
| CSREELLVN  | 311-319 | HLA-C*15:02                               | 1.0726 | 0.21937 |
| CGRTNELIK  | 273-281 | HLA-A*30:01                               | 0.8446 | 0.21221 |
| LIRSRRERAR | 461-469 | HLA-A*31:01<br>HLA-B*14:02                | 1.3840 | 0.06152 |
| YEIFIEQWN  | 599-607 | HLA-B*40:01                               | 1.3698 | 0.41651 |
| IDPHTNHLY  | 263-271 | HLA-A*29:02                               | 0.8416 | 0.08148 |

|           |         |             |        |         |
|-----------|---------|-------------|--------|---------|
| LYICGRTNE | 270-278 | HLA-C*14:02 | 1.5607 | 0.09965 |
|-----------|---------|-------------|--------|---------|

**Table S2** HTL Epitopes predicted by IEDB Consensus Method

| Protein                         |          |                                                                                                          |              |               |             |              |
|---------------------------------|----------|----------------------------------------------------------------------------------------------------------|--------------|---------------|-------------|--------------|
| Calcium binding                 |          |                                                                                                          |              |               |             |              |
| HTL epitopes                    | Position | alleles                                                                                                  | Antigenicity | IFN- $\gamma$ | IL-4        | IL-10        |
| KQDNRLRLSKNKKS                  | 332-346  | HLA-DRB1*04:26<br>HLA-DRB1*04:21<br>HLA-DRB1*11:01<br>HLA-DRB1*04:02                                     | 0.9238       | Positive      | IL4-inducer | IL10-inducer |
| QDNRLRLSKNKKSK                  | 333-347  | HLA-DRB1*04:26<br>HLA-DRB1*11:01<br>HLA-DRB1*04:21<br>HLA-DRB5*01:01<br>HLA-DRB1*04:02                   | 1.1906       | Positive      | IL4-inducer | IL10-inducer |
| Mycosubtilin synthase subunit C |          |                                                                                                          |              |               |             |              |
| KCSRNFKLIRSRERA                 | 454-468  | HLA-DRB5*01:01<br>HLA-DRB5*01:05                                                                         | 0.4332       | Positive      | IL4-inducer | IL10-inducer |
| RNFKLIRSRERARKV                 | 457-471  | HLA-DRB5*01:01<br>HLA-DRB5*01:05<br>HLA-DRB1*08:04<br>HLA-DRB1*11:01<br>HLA-DRB1*08:13<br>HLA-DRB1*08:06 | 1.0836       | Positive      | IL4-inducer | IL10-inducer |
| SRNFKLIRSRERARK                 | 456-470  | HLA-DRB5*01:01<br>HLA-DRB5*01:05<br>HLA-DRB1*08:04<br>HLA-DRB1*11:01<br>HLA-DRB1*08:13<br>HLA-DRB1*08:06 | 1.0114       | Positive      | IL4-inducer | IL10-inducer |
| GKCSRNFKLIRSRER                 | 453-467  | HLA-DRB5*01:01<br>HLA-DRB5*01:05                                                                         | 0.7614       | Positive      | IL4-inducer | IL10-inducer |
| FKLIRSRERARKVLA                 | 459-473  | HLA-DRB5*01:01<br>HLA-DRB5*01:05<br>HLA-DRB1*08:04<br>HLA-DRB1*08:13<br>HLA-DRB1*08:06                   | 0.8807       | Positive      | IL4-inducer | IL10-inducer |
| NKLVGVLISLPAKHV                 | 680-694  | HLA-DRB1*01:01<br>HLA-DRB1*04:04<br>HLA-DRB1*09:01                                                       | 0.8180       | Positive      | IL4-inducer | IL10-inducer |

|                  |         |                                                                                        |        |          |             |              |
|------------------|---------|----------------------------------------------------------------------------------------|--------|----------|-------------|--------------|
|                  |         | HLA-DRB5*01:01<br>HLA-DRB1*15:01<br>HLA-DRB1*12:01                                     |        |          |             |              |
| VGVLISLPAKHVPSR  | 683-697 | HLA-DRB1*01:01<br>HLA-DRB1*15:01<br>HLA-DRB1*09:01<br>HLA-DRB1*11:01<br>HLA-DRB1*12:01 | 0.6887 | Positive | IL4-inducer | IL10-inducer |
| EHTFVKNKLVGV LIS | 674-688 | HLA-DRB1*08:06<br>HLA-DRB1*13:02                                                       | 1.4159 | Positive | IL4-inducer | IL10-inducer |

**Table S3** LBL Epitopes predicted by ABCPred

| Peptide         | Protein                         | Score | Antigenicity | Immunogenicity |
|-----------------|---------------------------------|-------|--------------|----------------|
| FIPDYVEDDLDGNG  | calcium binding                 | 0.89  | 1.6532       | 0.23092        |
| DDQDDDDDNNGIKD  | calcium binding                 | 0.86  | 1.2587       | 0.07674        |
| KSDNDGIIDFYDD   | calcium binding                 | 0.85  | 0.6044       | 0.41776        |
| DSDGDGIPDYLNN   | calcium binding                 | 0.85  | 0.8382       | 0.21302        |
| DGIIDFYDDDDND   | calcium binding                 | 0.83  | 0.5183       | 0.40974        |
| GDGVPDYLEDANS   | calcium binding                 | 0.83  | 0.5520       | 0.21816        |
| SDGDGIPDYQEDSD  | calcium binding                 | 0.82  | 0.8082       | 0.10663        |
| DGDGIPDYLD DDD  | calcium binding                 | 0.81  | 0.5581       | 0.24146        |
| LEGDINHNGIIDYL  | calcium binding                 | 0.80  | 1.3728       | 0.48626        |
| VPDHLEEDSDGDI   | calcium binding                 | 0.79  | 1.1378       | 0.17647        |
| DDDNDDIPDHLDSD  | calcium binding                 | 0.78  | 0.8840       | 0.12741        |
| NDGIPDDQDDDDDN  | calcium binding                 | 0.68  | 1.6097       | 0.16028        |
| DDDDDGILDIHEDE  | calcium binding                 | 0.66  | 0.8358       | 0.48203        |
| DSDGDGILDFLEDS  | calcium binding                 | 0.66  | 0.7632       | 0.43732        |
| DHLETDDTDGDGII  | calcium binding                 | 0.65  | 0.7522       | 0.39779        |
| DCDDDDDDDDGILD  | calcium binding                 | 0.61  | 1.7767       | 0.29686        |
| GDSVPEDKVADR NH | calcium binding                 | 0.61  | 0.8812       | 0.02522        |
| DFLEDSGDGIPDY   | calcium binding                 | 0.58  | 0.5002       | 0.19573        |
| DVTGIVFHNELDVK  | Mycosubtilin synthase subunit C | 0.84  | 1.1856       | 0.4856         |
| IDVLVNAFIEKDRL  | Mycosubtilin synthase subunit C | 0.82  | 0.6455       | 0.2613         |
| FMPGDLGFIDPHTN  | Mycosubtilin synthase subunit C | 0.73  | 0.6452       | 0.37904        |
| EQLRQLGFNVNLDV  | Mycosubtilin synthase subunit C | 0.72  | 1.5411       | 0.10329        |
| LTEVIESYLN AHKY | Mycosubtilin synthase subunit C | 0.66  | 0.8240       | 0.05747        |

**Table S4** Conformational B cell epitopes in the vaccine predicted by ElliPro Server

| Sr.No | Residues                                                                                                                                                                                                                                               | No. of residues | Score | 3D structure                                                                          |
|-------|--------------------------------------------------------------------------------------------------------------------------------------------------------------------------------------------------------------------------------------------------------|-----------------|-------|---------------------------------------------------------------------------------------|
|       | _:A1, _:P2, _:P3, _:H4, _:A5, _:L6, _:S7, _:E8, _:A9, _:A10, _:A11, _:K12, _:I13, _:P14, _:D15, _:H16, _:L17, _:E18, _:G19, _:D20, _:I21, _:A22, _:A23, _:Y24, _:F25, _:S26, _:P27, _:R28, _:R29, _:R31                                                | 30              | 0.904 | 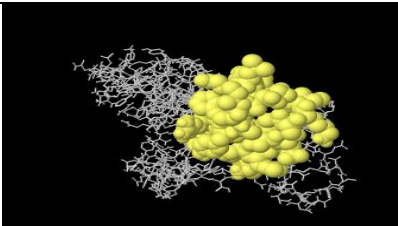   |
|       | _:H152, _:V153, _:K154, _:K155, _:I157, _:P158, _:D159, _:V161, _:E162, _:D163, _:D164, _:L165, _:D166, _:G167, _:N168, _:G169, _:K170, _:K171, _:D172, _:C173, _:D174, _:D175, _:D176, _:D177, _:D178, _:D179, _:D180, _:D181, _:G182, _:D185, _:K186 | 31              | 0.732 |    |
|       | _:K202, _:K203, _:T205, _:E206, _:V207, _:I208, _:E209, _:S210, _:Y211, _:L212, _:N213, _:A214, _:H215, _:K216, _:Y217                                                                                                                                 | 15              | 0.704 |   |
|       | _:K68, _:A70, _:A71, _:Y72, _:R73, _:Q74, _:L75, _:G76, _:V79, _:A82, _:A83, _:Y85                                                                                                                                                                     | 12              | 0.644 |  |
|       | _:Y30, _:K32, _:L33, _:A34, _:A35, _:Y36, _:E39                                                                                                                                                                                                        | 7               | 0.641 |  |
|       | _:Y60, _:R63, _:E64, _:R67                                                                                                                                                                                                                             | 4               | 0.593 |  |

|  |                                                   |   |       |                                                                                     |
|--|---------------------------------------------------|---|-------|-------------------------------------------------------------------------------------|
|  | _:L106, _:S112, _:K113, _:G114,<br>_:P115, _:G116 | 6 | 0.508 | 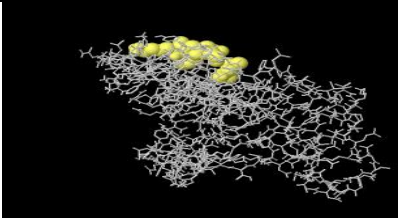 |
|--|---------------------------------------------------|---|-------|-------------------------------------------------------------------------------------|

**Table S5** Linear B cell epitopes predicted in vaccine by ABCPred server

| Sr.No | Peptide         | Position | Score | Antigenicity |
|-------|-----------------|----------|-------|--------------|
| 1.    | VGVLISLPAKHVKK  | 142      | 0.83  | 0.7008       |
| 2.    | DDLDGNGKKDCDDD  | 163      | 0.81  | 1.4896       |
| 3.    | KKSKGPGPGRNFKL  | 110      | 0.81  | 0.5205       |
| 4.    | AKIPDHLEGDIAAY  | 11       | 0.80  | 0.9291       |
| 5.    | PRRYRKLAAYEVEA  | 27       | 0.79  | 0.5366       |
| 6.    | NLAAYYENPYEHTF  | 80       | 0.77  | 0.7856       |
| 7.    | YRSRERARKVAAYR  | 60       | 0.77  | 1.0773       |
| 8.    | IPDYVEDDLDGNGK  | 157      | 0.76  | 1.5153       |
| 9.    | LGFNVNLAAYYENP  | 75       | 0.74  | 1.1876       |
| 10.   | PGRNFKLIRSRERA  | 117      | 0.73  | 0.5278       |
| 11.   | EGDIAAYFSPRRYR  | 18       | 0.69  | 1.1236       |
| 12.   | EAYAAAYFMAVFSHY | 43       | 0.64  | 0.9670       |
| 13.   | DDDDDDDDGILDKKD | 175      | 0.60  | 0.9661       |
| 14.   | LRLSKNKKSKGPGP  | 104      | 0.60  | 1.3415       |
| 15.   | SHYIAAYRSRERAR  | 54       | 0.57  | 0.8101       |
| 16.   | KKDCDDDDDDDDGI  | 170      | 0.56  | 1.2584       |
